# Supplementary material for: Metabolomics Analysis in Serum from Patients with Colorectal Polyp and Colorectal Cancer by 1H-NMR Spectrometry
Source: Hindawi journal article supplement (doi:10.1155/2019/3491852), 2019-04-07
Supplement: f1 [file 3491852.f1.pdf]

## ***Supplementary Material***

### **Metabolomics analysis in serum from patients with colorectal polyp and colorectal cancer by $^1\text{H}$ -NMR spectrometry**

Jinping Gu, Yaqing Xiao, Dan Shu, Xianrui Liang, Xiaomin Hu, Yuanyuan Xie,

Donghai Lin, Hua Li

**5 Supplementary Figures**

**7 Supplementary Tables**

**Table S1.** Main demographic and clinical features of the participants.

|                     | healthy controls | Colorectal polyp patients | CRC patients |
|---------------------|------------------|---------------------------|--------------|
| Number              | 38               | 32                        | 40           |
| Age (Median, Range) | 55, 35-77        | 57, 26-86                 | 60, 25-82    |
| Sex (Male / Female) | 21/17            | 20/12                     | 27/13        |
| Tumor stage         |                  |                           |              |
| Stage I             | /                | /                         | 7            |
| Stage II            | /                | /                         | 9            |
| Stage III           | /                | /                         | 14           |
| Stage IV            | /                | /                         | 10           |

**Table S2.** The major parameters of CV-AVOVA in the OPLS-DA model of Colorectal polyp vs. Control

|             | SS     | DF | MS       | F       | p        | SD       |
|-------------|--------|----|----------|---------|----------|----------|
| Total corr. | 69     | 69 | 1        |         |          | 1        |
| Regression  | 54.262 | 4  | 13.5655  | 59.8287 | 4.32E-21 | 3.68314  |
| Residual    | 14.738 | 65 | 0.226739 |         |          | 0.476171 |

**Table S3.** The major parameters of CV-AVOVA in the OPLS-DA model of CRC vs. Control

|             | SS     | DF | MS       | F       | p        | SD      |
|-------------|--------|----|----------|---------|----------|---------|
| Total corr. | 77     | 77 | 1        |         |          | 1       |
| Regression  | 66.116 | 4  | 16.529   | 110.861 | 3.13E-30 | 4.06559 |
| Residual    | 10.884 | 73 | 0.149096 |         |          | 0.38613 |

**Table S4.** The major parameters of CV-AVOVA in the OPLS-DA model of CRC vs. Colorectal polyp

|             | SS      | DF | MS       | F        | p        | SD       |
|-------------|---------|----|----------|----------|----------|----------|
| Total corr. | 71      | 71 | 1        |          |          | 1        |
| Regression  | 26.3314 | 4  | 9.58284  | 19.87383 | 2.43E-06 | 2.56571  |
| Residual    | 24.6686 | 67 | 0.366696 |          |          | 0.416514 |

**Table S5.** The major parameters in the ROC curve of acetate/glycerol

|                                 | Threshold | Sensitivity | Specificity | AUC    | Accuracy | PPV    | NPV    |
|---------------------------------|-----------|-------------|-------------|--------|----------|--------|--------|
| Colorectal polyp<br>vs. Control | 0.3145    | 0.8125      | 0.7895      | 0.8310 | 80.00%   | 76.47% | 83.33% |
| Colorectal polyp<br>vs. CRC     | 0.3417    | 0.5750      | 0.8158      | 0.7130 | 69.23%   | 76.67% | 64.58% |
| CRC vs. Control                 | 0.2997    | 0.7188      | 0.6250      | 0.6690 | 66.67%   | 60.53% | 73.53% |

**Table S6.** The major parameters in the ROC curve of lactate/citrate

|                                 | Threshold | Sensitivity | Specificity | AUC    | Accuracy | PPV    | NPV    |
|---------------------------------|-----------|-------------|-------------|--------|----------|--------|--------|
| Colorectal polyp<br>vs. Control | 4.7432    | 0.7813      | 0.7368      | 0.8210 | 75.71%   | 71.43% | 80.00% |
| Colorectal polyp<br>vs. CRC     | 6.0213    | 0.7188      | 0.6750      | 0.7720 | 69.44%   | 63.89% | 75.00% |
| CRC vs. Control                 | 4.7778    | 0.7750      | 0.7368      | 0.8270 | 75.64%   | 75.61% | 75.68% |

**Table S7.** Main demographic and clinical features of the participants from the validation samples

|                     | healthy controls | Colorectal polyp patients | CRC patients |
|---------------------|------------------|---------------------------|--------------|
| Number              | 8                | 8                         | 8            |
| Age (Median, Range) | 40, 35-47        | 47, 44-66                 | 50, 48-68    |
| Sex (Male / Female) | 4/4              | 5/3                       | 6/2          |
| Tumor stage         |                  |                           |              |
| Stage I             | /                | /                         | 2            |
| Stage II            | /                | /                         | 5            |
| Stage III           | /                | /                         | 1            |
| Stage IV            | /                | /                         | /            |

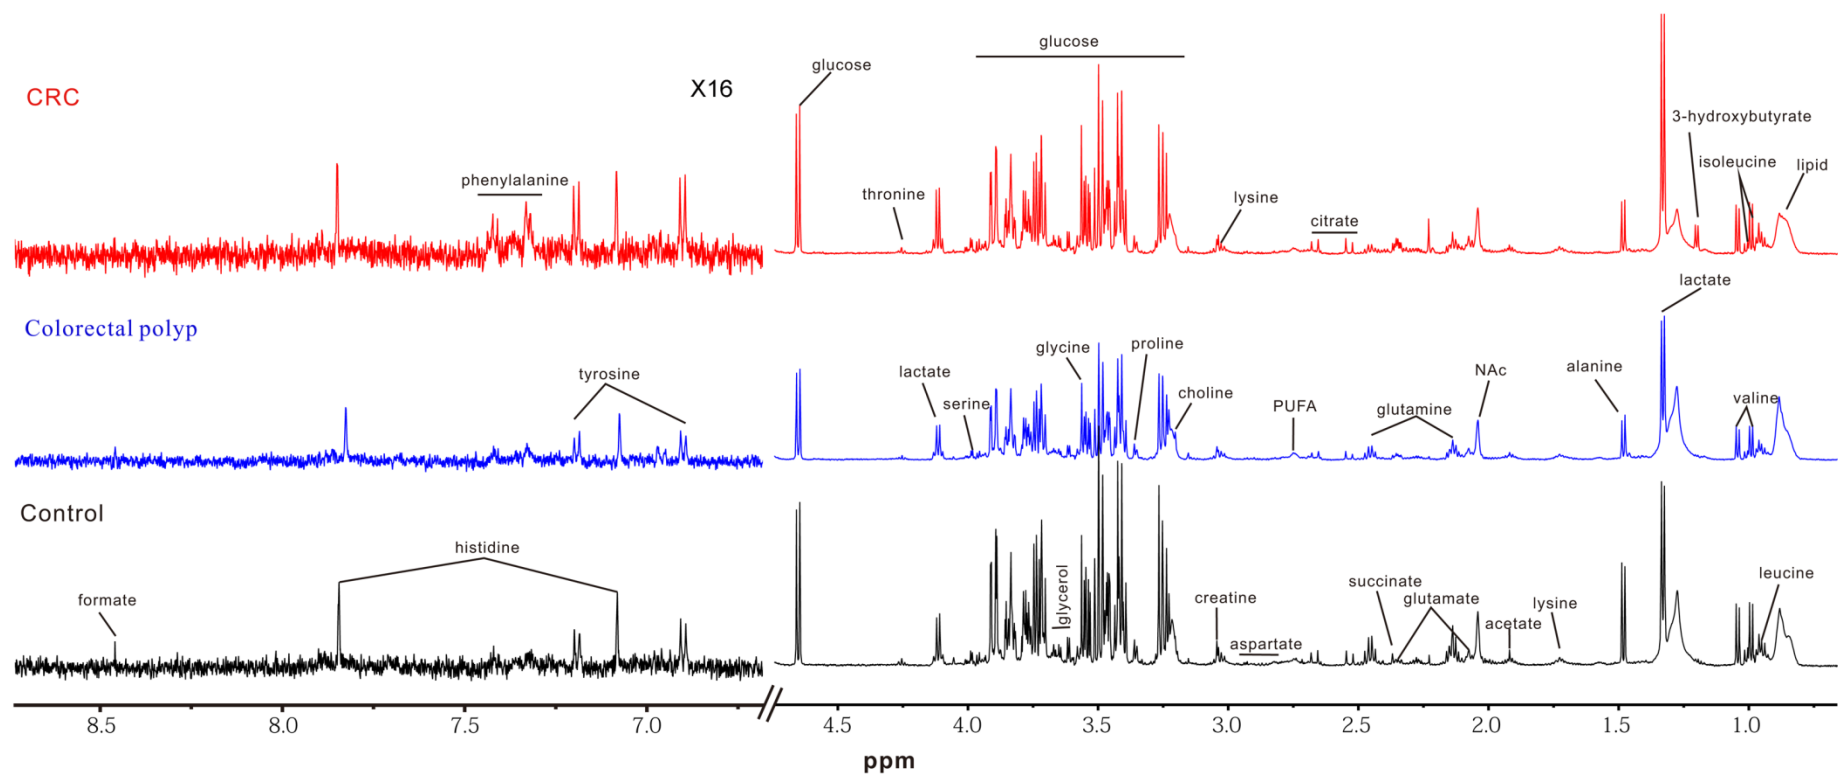

**Fig. S1.** The typical  $^1\text{H}$  NMR spectra of serum samples from colorectal cancer patients (red), colorectal polyp patients (blue) and healthy controls (black) , respectively.

\*NAc, N-acetyl glycoproteins; PUFA, polyunsaturated fatty acid.

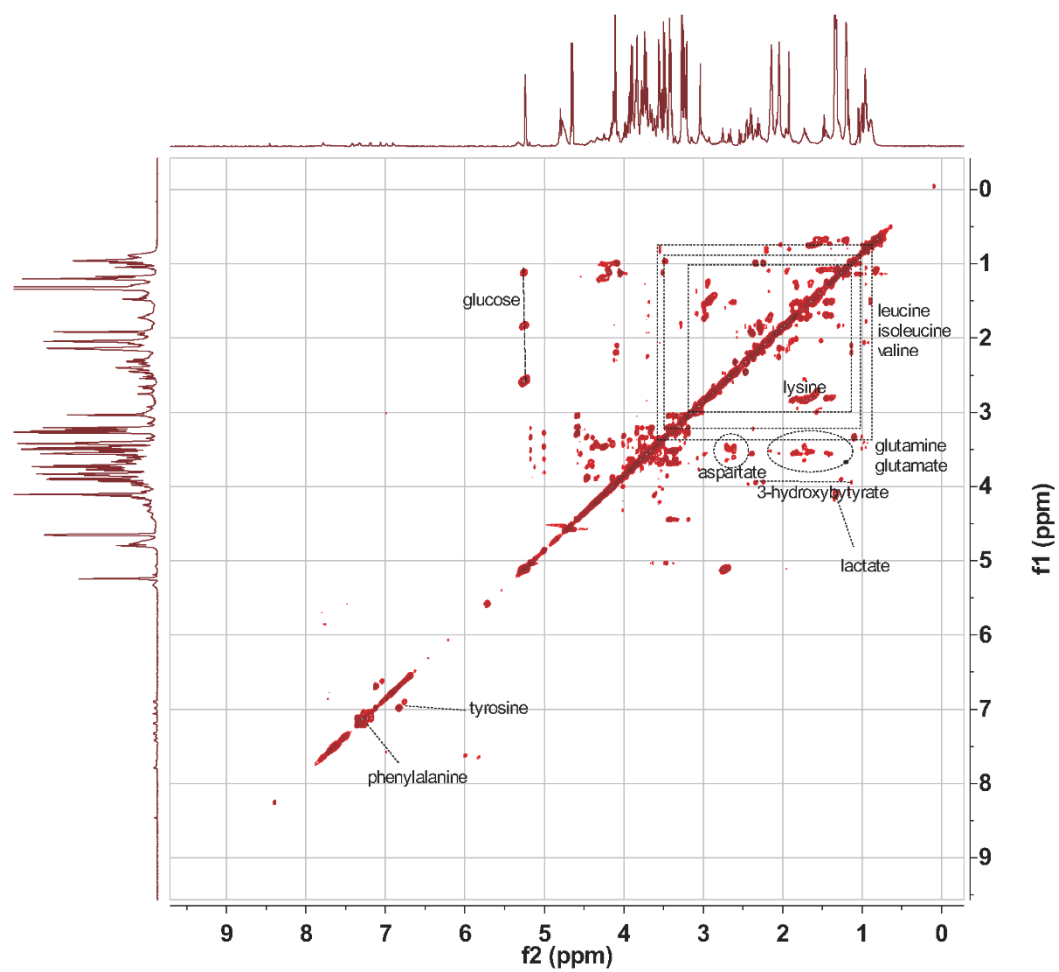

**Fig. S2.** The typical TOCSY spectrum of control serum sample

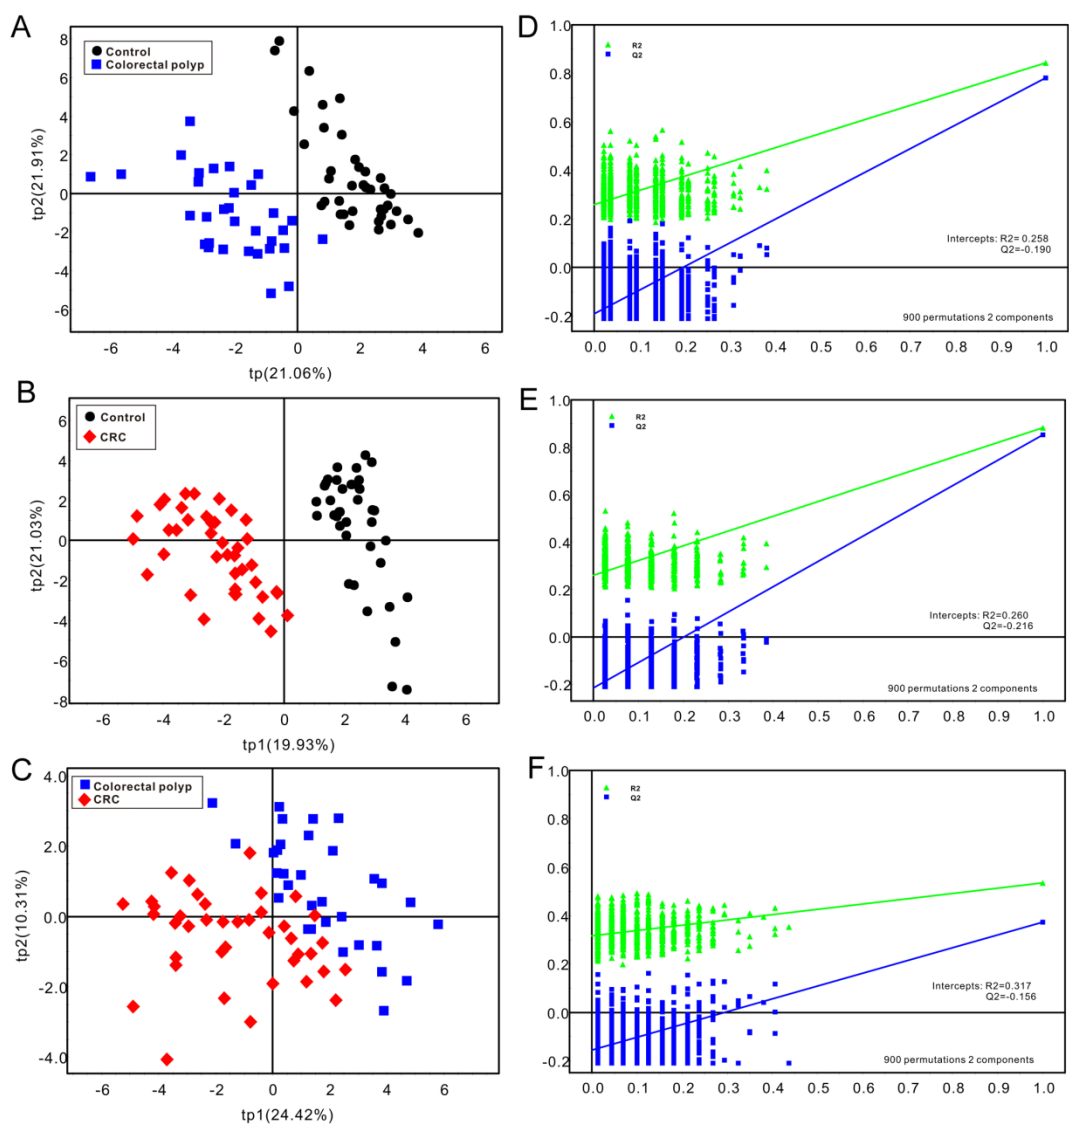

**Fig. S3.** PLS-DA scores plots derived from NMR spectra of the serum samples (A, B, C) and the corresponding validation plots of PLS-DA models, which generated from the permutation tests that were randomly permuted 600 times (D, E, F). (A, D) Colorectal polyps vs. Controls; (B, E) CRC vs. Control; (C, F) CRC vs. Colorectal polyps.

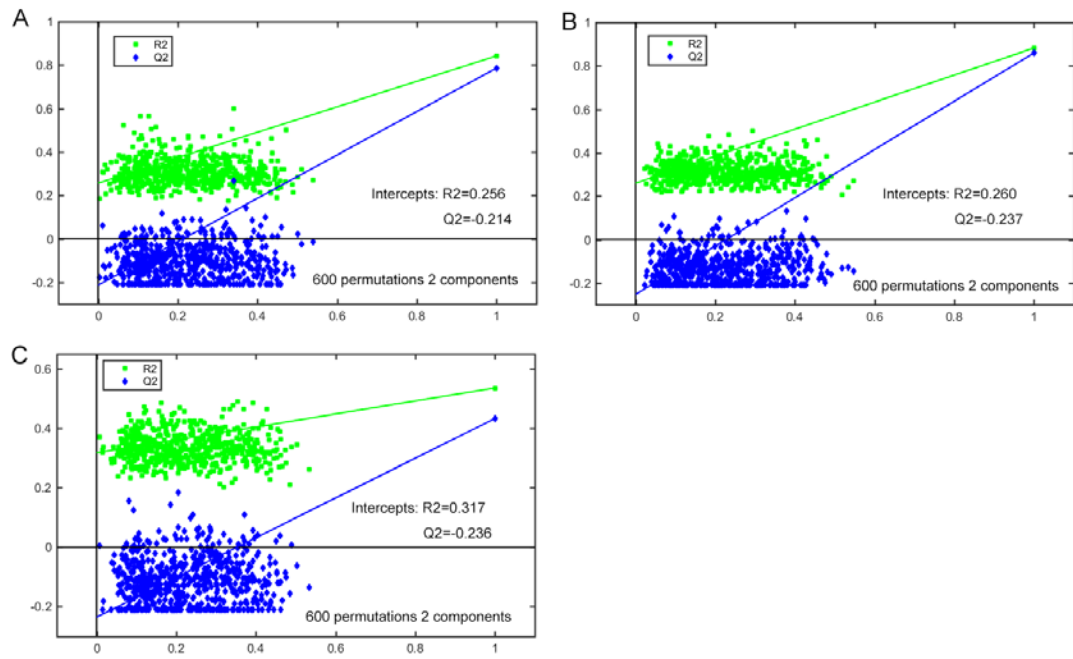

**Fig. S4.** The corresponding validation plots of OPLS-DA models, which generated from the permutation tests that were randomly permuted 600 times (A) Colorectal polyps vs. Controls; (B) CRC vs. Control; (C) CRC vs. Colorectal polyps.



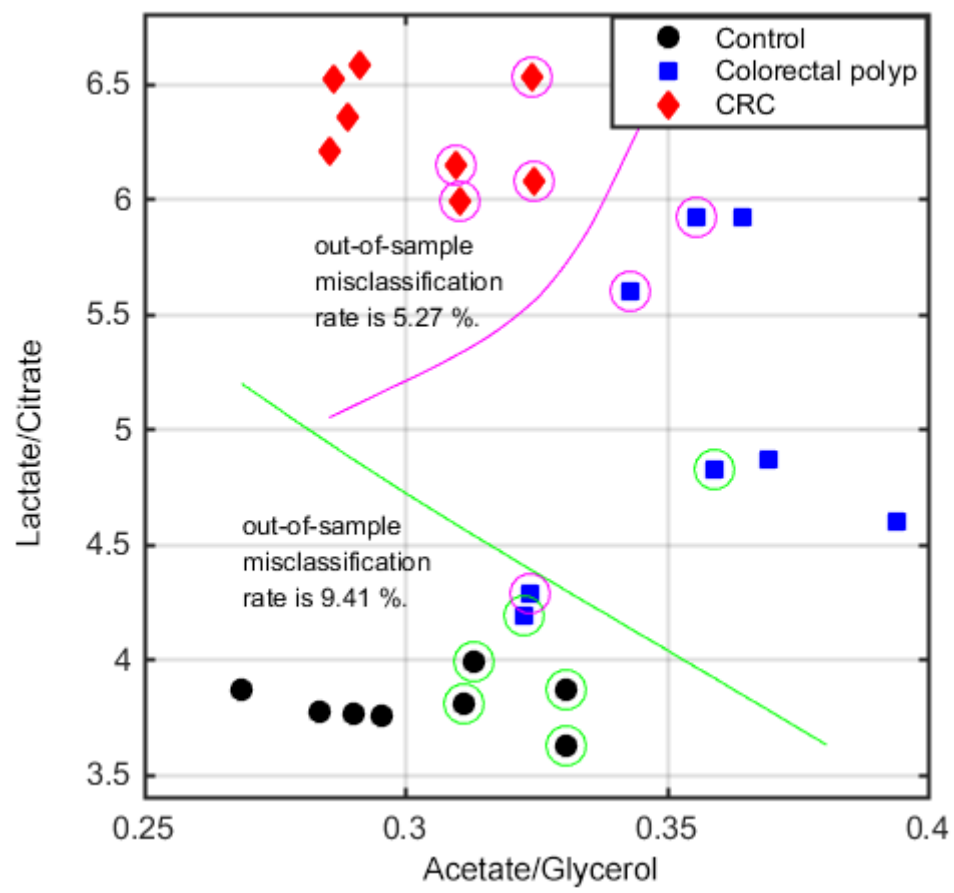

**Fig. S5.** The results of SVM classifier in the validation set
